# Supplementary material for: High Expression of AhR and Environmental Pollution As AhR Linked Ligands Impact on Oncogenic Signaling Pathways in Western Patients With Diffuse Gastric Cancers. A Pilot Study
Source: Preprints.org preprint supplement (doi:10.20944/preprints202406.1594.v1), 2024-06-24
Supplement: Supplementary file 1 [file supplementary]

**Sup Table S1.** **Relationship between *AhR* mRNA expression and clinical biological parameters in a series of 29 gastric cancers including diffuse- and intestinal subtypes.**

Median range of gene mRNA expression levels; p value (Mann Whitney). ND, not determined

| **All Tumors**  **n=29** | | **Diffuse sub-type**  **n=13** | | **Intestinal sub-type**  **n=16** | |
| --- | --- | --- | --- | --- | --- |
|  | ***AhR*** |  | ***AhR*** |  | ***AhR*** |
| **Gender Male (n=13) Female (n=16)** | p=0.51 1.54 (0.55-3.33) 1.35 (0.65-3.53) | **Gender Male (n=6) Female (n=7)** | p=0.81 1.51 (0.87-3.08) 1.58 (1.22-2.01) | **Gender Male (n=7) Female (n=9)** | p=0.19 1.71 (0.89-2.84) 1.16 (0.89-1.83) |
| **Age <60 years (n=9) >60 years (n=20)** | p=0.82 1.94 (0.55-3.35) 1.80 (0.65-3.53) | **Age <60 years (n=8) >60 years (n=5)** | p=0.72 1.51 (0.87-2.01) 1.58 (1.22-3.08) | **Age <60 years (n=1) >60 years (n=15)** | p=0.80 1.38 (0.89-1.83) 1.16 (0.90-2.84) |
| **Smoking negative (n=12) positive (n=10)** | p=0.85 1.77 (0.55-3.35) 1.85 (0.82-3.53) | **Smoking negative (n=4) positive (n=3)** | p=0.63 1.51 (0.87-1.63) 1.58 (1.27-2.01) | **Smoking negative (n=8) positive (n=7)** | p=0.74 1.19 (0.89-1.71) 0.96 (0.9-1.55) |
| **Tumor invasion T T1-T2 (n=6) T3-T4 (n=23)** | p=0.21 1.45 (0.65-2.86) 1.94 (0.55-3.53) | **Tumor invasion T1-T2 (n=2) T3-T4 (n=11)** | ND 1.42 (1.27-1.58) 1.53 (0.9-3.1) | **Tumor invasion T1-T2 (n=4) T3-T4 (n=12)** | ND 0.93 (0.9-0.96) 1.55 (0.89-2.84) |
| **Lymphatic invasion negative (n=11) positive (n=17)** | p=0.11 1.25 (0.65-3.18) 2.11 (0.55-3.53) | **Lymphatic invasion negative (n=1) positive (n=12)** | ND 1.53 1.53 (0.87-3.08) | **Lymphatic invasion negative (n=10) positive (n=5)** | p=0.61 1.71 (0.65-3.18) 1.94 (1.21-3.53) |
| **Metastasis M negative (n=24) positive (n=5)** | p=0.92 1.96 (0.55-3.53) 2.1 (0.82-2.55) | **Metastasis negative (n=9) positive (n=4)** | p=0.93 1.49 (0.87-3.08) 1.58 (1.22-2.01) | **Metastasis negative (n=15) positive (n=1)** | p=0.79 1.71 (0.89-2.84) 1.19 (1.16-1.55) |
| **TNM I-II (n=16) III-IV (n=13)** | p=0.30 1.77 (0.54-3.35) 2.11 (0.82-3.53) | **TNM I-II (n=5) III-IV (n=8)** | p=0.21 1.32 (0.87-1.9) 1.6 (1.22-3.08) | **TNM I-II (n=11) III-IV (n=5)** | p=0.80 1.71 (0.89-1.83) 1.19 (0.9-2.84) |
| **Vascular invasion negative (n=9) positive (n=20)** | p=0.14 1.25 (0.82-2.96) 2.05 (0.55-3.53) | **Vascular invasion negative (n=3) positive (n=10)** | p>0.9999 1.53 (1.32-1.63) 1.53 (0.87-3.08) | **Vascular invasion negative (n=6) positive (n=10)** | p=0.79 1.21 (1.18-1.72) 1.35 (0.89-2.84) |
| **Neural invasion negative (n=6) positive (n=23)** | p=0.47 1.58 (0.90-2.86) 1.94 (0.55-3.53) | **EPN negative (n=2) positive (n=11)** | ND 1.42 (1.27-1.58) 1.53 (0.9-3.1) | **EPN negative (n= 4) positive (n= 12)** | ND 0.93 (0.9-0.96) 1.55 (0.89-2.84) |
